# Supplementary material for: Subjective assessment of HDTV with superresolution function
Source: Springer Nature journal article supplement (doi:10.1186/1687-5281-2014-11), 2014-02-21
Supplement: 13640_2013_113_MOESM3_ESM.pdf [file 13640_2013_113_MOESM3_ESM.pdf]

A

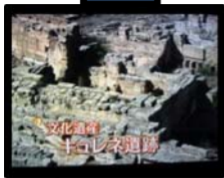

B

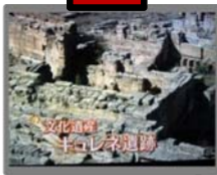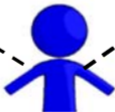

- Synchronized HDTV video is provided to TV A and TV B
- Observers can move freely to assess resolution
