# Supplementary material for: Subjective assessment of HDTV with superresolution function
Source: Springer Nature journal article supplement (doi:10.1186/1687-5281-2014-11), 2014-02-21

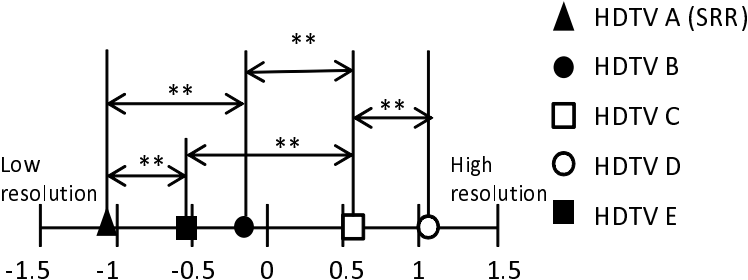

Supplement: 13640_2013_113_MOESM11_ESM.pdf [file 13640_2013_113_MOESM11_ESM.pdf]
